# Supplementary material for: Prediction of Intracranial Infection in Patients under External Ventricular Drainage and Neurological Intensive Care: A Multicenter Retrospective Cohort Study
Source: MDPI journal article supplement (doi:10.3390/jcm11143973), 2022-07-08
Supplement: s1 [file s1]

**Supplementary Table S1. Demographic and clinical features between training-set and validation-set\***

| Variable                                             | Training set (n=483) | validation set (n=111) | <i>p</i> |
|------------------------------------------------------|----------------------|------------------------|----------|
| Clinical characteristics                             |                      |                        |          |
| Gender (male)                                        | 216 (44.72%)         | 51 (45.95%)            | 0.815    |
| Age (years)                                          | 54.6(14.91)          | 56.6 (13.02)           | 0.193    |
| BMI                                                  | 23.44 (3.72)         | 23.29 (3.59)           | 0.704    |
| History of diabetes                                  | 70 (14.49%)          | 17 (15.32%)            | 0.825    |
| ASA grades                                           | 2.44 (0.92)          | 2.51 (0.96)            | 0.49     |
| BP on admission (mmHg)                               | 141.91 (12.47)       | 141.56 (12.62)         | 0.795    |
| GCS 3-8                                              | 72 (14.91)%          | 18 (16.22%)            | 0.73     |
| GCS 9-12                                             | 85 (17.60%)          | 22 (19.82%)            | 0.583    |
| GCS 13-15                                            | 326 (67.49%)         | 71 (63.96%)            | 0.476    |
| Pre-operative intubation (n, %)                      | 97 (20.08%)          | 19 (17.12%)            | 0.48     |
| Lopt (minutes)                                       | 129.89 (81.64)       | 143.36 (85.01)         | 0.121    |
| Cases underwent operations in addition to EVD (n, %) | 186 (38.51%)         | 51 (45.95%)            | 0.149    |
| Diagnosis and complications                          |                      |                        |          |
| Hydrocephalus (n, %)                                 | 57 (11.8%)           | 16 (14.41%)            | 0.45     |
| Spontaneous ICH (n, %)                               | 259 (53.62%)         | 57 (51.35%)            | 0.665    |
| Traumatic brain injury (n, %)                        | 162 (33.54%)         | 43 (38.74%)            | 0.299    |
| Skull fracture (n, %)                                | 145 (30.02%)         | 32 (28.83%)            | 0.804    |
| tSAH (n, %)                                          | 177 (36.6%)          | 38 (34.2%)             | 0.634    |
| CSF leakage due to trauma (n, %)                     | 28 (5.8%)            | 8 (7.21%)              | 0.574    |
| Non-intracranial infections (n, %)                   | 31 (6.42%)           | 9 (8.11%)              | 0.522    |
| First laboratory tests                               |                      |                        |          |
| RBC (10 <sup>12</sup> /L)                            | 4.49 (0.84)          | 4.51 (0.86)            | 0.877    |
| HB (g/L)                                             | 119.02 (31.05)       | 115.73 (44.04)         | 0.179    |
| WBC (10 <sup>9</sup> /L)                             | 13.16 (5.02)         | 12.71(4.59)            | 0.391    |
| NEUT (%)                                             | 84.53 (9.54)         | 83.79 (10.32)          | 0.477    |
| PLT (10 <sup>9</sup> /L)                             | 199.86 (70.38)       | 195.08 (67.35)         | 0.516    |
| TBIL (μmol/L)                                        | 12.4 (6.93)          | 12.65 (6.97)           | 0.737    |
| DBIL(μml/L)                                          | 4.92 (2.89)          | 5.02 (2.88)            | 0.748    |
| ALT (U/L)                                            | 34.144 (27.003)      | 38.259 (29.086)        | 0.161    |
| AST (U/L)                                            | 37.911 (31.491)      | 39.917 (37.121)        | 0.565    |
| LDH (U/L)                                            | 204.92 (64.79)       | 201.89 (59.24)         | 0.653    |
| HDL (mmol/L)                                         | 2.03 (0.59)          | 2.03 (0.58)            | 0.895    |
| LDL (mmol/L)                                         | 2.93 (1.17)          | 2.97 (1.12)            | 0.539    |
| Ch (μml/L)                                           | 5.02 (1.14)          | 4.91 (1.07)            | 0.331    |
| Ab (g/L)                                             | 37.177 (7.353)       | 36.110 (7.115)         | 0.17     |
| GLB (g/L)                                            | 33.3 (9.78)          | 29.9 (7.68)            | 0.775    |
| BUN (mmol/L)                                         | 5.92 (1.72)          | 5.95 (1.75)            | 0.839    |
| UA (mmol/L)                                          | 248.64 (94.89)       | 264.98 (98.23)         | 0.105    |
| SCR (μmol/L)                                         | 5.99 (1.18)          | 5.99 (1.07)            | 0.686    |
| Post-operative EVD monitoring                        |                      |                        |          |

|                                   |              |              |       |
|-----------------------------------|--------------|--------------|-------|
| Length of EVD (days)              | 6.07 (2.24)  | 5.72 (2.34)  | 0.142 |
| Number of CSF sampling (per week) | 2.99 (1.37)  | 2.99 (1.39)  | 0.97  |
| Leakage from EVD site (n, %)      | 32 (6.63%)   | 11 (9.91%)   | 0.229 |
| <b>Outcomes</b>                   |              |              |       |
| ICU length of stay (days)         | 8.2 (4.53)   | 7.69 (3.78)  | 0.274 |
| Hospital stays (days)             | 15.04 (6.78) | 14.41 (6.02) | 0.634 |
| In-hospital mortality (n, %)      | 61 (12.63%)  | 12 (10.81%)  | 0.599 |

\*Continuous data are shown as mean (standard deviation).

Abbreviations: EVD, external ventricular drainage; CSF, cerebrospinal fluid; ICH, intracranial hemorrhage; ASA, American Society of Anesthesiologists; Lopt, length of operation time; tSAH, traumatic subarachnoid hemorrhage; RBC, red blood cell; HB, hemoglobin; WBC, white blood cell; NEUT, neutrophil ration; PLT, platelet; TBIL, indirect bilirubin; DBIL, direct bilirubin; ALT, glutamic pyruvic transaminase; AST, glutamic oxalacetic transaminase; LDH, lactate dehydrogenase; HDL, high-density lipoprotein; LDL, low-density lipoprotein; Ch, cholinesterase; Ab, albumin; GLB, globulin; BUN, urea nitrogen; UA, uric acid; SCR, creatinine; BP, blood pressure; GCS, Glasgow coma scale; BMI, body mass index; ICU, intensive care unit.

**Supplementary Table S2. Characteristic of patients with tSAH**

| Variable                         | tSAH (n=215) | Non-tSAH (n=379) | P-value |
|----------------------------------|--------------|------------------|---------|
| <b>GCS</b>                       | 3-8          | 49 (22.79%)      | <0.01   |
|                                  | 9-12         | 87 (40.47%)      |         |
|                                  | 13-15        | 162 (75.35%)     |         |
| <b>Hospital stays (days)</b>     | 15.67 (3.43) | 9.78 (3.54)      | <0.01   |
| <b>Length of EVD (days)</b>      | 18.85 (6.14) | 12.05 (3.24)     | <0.01   |
| <b>Time to infection (days)</b>  | 7.94 (1.32)  | 5.99 (0.82)      | <0.01   |
| <b>ICU length of stay (days)</b> | 7.49 (1.42)  | 5.07 (1.44)      | <0.01   |

Abbreviations: tSAH, traumatic subarachnoid hemorrhage; GCS, Glasgow Coma Scale; EVD, external ventricular drain; ICU, intensive care unit.
